# Supplementary material
Source: PubMed Central journal article supplement (PMC2952557)
Supplement: supp_M008334_jlr.M008334-1.pdf [file supp_M008334_jlr.M008334-1.pdf]

Table 1. Docosahexaenoic acid incorporation coefficients k\* in iPLA<sub>2</sub>β<sup>+/+</sup>, iPLA<sub>2</sub>β<sup>+/-</sup>, and iPLA<sub>2</sub>β<sup>-/-</sup> mice in response to arecoline, in regions with statistically significant genotype x drug interactions

| Brain region               | iPLA <sub>2</sub> β <sup>+/+</sup> |                  | iPLA <sub>2</sub> β <sup>+/-</sup> |                 | iPLA <sub>2</sub> β <sup>-/-</sup> |                 |
|----------------------------|------------------------------------|------------------|------------------------------------|-----------------|------------------------------------|-----------------|
|                            | Saline                             | Arecoline        | Saline                             | Arecoline       | Saline                             | Arecoline       |
|                            | (n = 7)                            | (n = 6)          | (n = 7)                            | (n = 6)         | (n = 8)                            | (n = 6)         |
| Frontal cortex (10)        |                                    |                  |                                    |                 |                                    |                 |
| Layer I                    | 17.26 ± 2.43                       | 43.59 ± 4.67***  | 13.89 ± 2.10                       | 26.92 ± 7.05*** | 13.62 ± 2.77                       | 35.49 ± 8.23*** |
| Layer IV                   | 23.11 ± 2.15                       | 56.32 ± 10.80*** | 16.59 ± 3.05                       | 26.02 ± 8.51*   | 15.50 ± 4.49                       | 30.47 ± 7.53*** |
| Frontal cortex (8)         |                                    |                  |                                    |                 |                                    |                 |
| Layer I                    | 20.24 ± 5.02                       | 49.42 ± 10.44*** | 16.68 ± 3.44                       | 26.47 ± 7.99*   | 14.85 ± 4.03                       | 26.37 ± 3.94**  |
| Layer IV                   | 25.38 ± 4.42                       | 56.43 ± 14.09*** | 19.52 ± 5.08                       | 31.01 ± 7.47*   | 16.18 ± 5.52                       | 33.25 ± 6.98**  |
| Pyriform cortex            | 13.32 ± 2.87                       | 29.88 ± 6.53***  | 14.83 ± 3.59                       | 16.40 ± 2.63    | 11.22 ± 1.85                       | 19.48 ± 4.48**  |
| Anterior cingulate cortex  | 24.53 ± 5.83                       | 53.01 ± 7.23***  | 17.52 ± 3.42                       | 25.33 ± 5.65*   | 16.18 ± 2.59                       | 27.50 ± 6.13**  |
| Motor cortex               |                                    |                  |                                    |                 |                                    |                 |
| Layer I                    | 17.10 ± 3.87                       | 38.85 ± 7.91***  | 13.85 ± 2.86                       | 21.21 ± 5.13*   | 12.19 ± 2.50                       | 21.68 ± 2.33**  |
| Layer II-III               | 18.79 ± 3.66                       | 40.45 ± 8.95***  | 15.38 ± 2.27                       | 20.63 ± 3.58    | 12.35 ± 1.68                       | 25.73 ± 4.12*** |
| Layer IV                   | 23.87 ± 4.46                       | 48.30 ± 6.71***  | 17.38 ± 3.80                       | 26.14 ± 7.79    | 15.15 ± 1.82                       | 28.89 ± 5.91*   |
| Layer V                    | 19.98 ± 3.76                       | 41.87 ± 5.88***  | 13.64 ± 2.41                       | 19.28 ± 4.11*   | 12.40 ± 1.24                       | 22.18 ± 4.26*** |
| Layer VI                   | 18.48 ± 4.08                       | 38.19 ± 6.83***  | 13.77 ± 2.17                       | 19.75 ± 4.73*   | 11.29 ± 1.32                       | 22.70 ± 4.04*** |
| Somatosensory cortex       |                                    |                  |                                    |                 |                                    |                 |
| Layer I                    | 20.69 ± 6.07                       | 42.60 ± 4.62***  | 13.95 ± 2.80                       | 22.09 ± 3.47*   | 12.47 ± 1.69                       | 24.15 ± 3.74*** |
| Layer II-III               | 21.28 ± 5.16                       | 45.63 ± 5.77***  | 16.33 ± 2.36                       | 23.54 ± 4.83*   | 15.55 ± 2.86                       | 27.34 ± 3.41*** |
| Layer IV                   | 27.81 ± 5.45                       | 56.28 ± 8.22***  | 19.63 ± 3.83                       | 27.27 ± 6.29*   | 18.66 ± 4.13                       | 28.44 ± 3.95**  |
| Layer V                    | 25.58 ± 4.51                       | 51.77 ± 5.19***  | 17.76 ± 2.84                       | 24.84 ± 6.01*   | 16.84 ± 2.16                       | 23.29 ± 4.47    |
| Layer VI                   | 23.20 ± 2.97                       | 47.85 ± 6.62***  | 16.57 ± 2.47                       | 24.21 ± 5.44*   | 14.26 ± 2.10                       | 25.23 ± 6.72**  |
| Auditory cortex            |                                    |                  |                                    |                 |                                    |                 |
| Layer I                    | 21.55 ± 3.99                       | 41.05 ± 6.87***  | 14.26 ± 4.04                       | 22.85 ± 5.16**  | 14.32 ± 2.41                       | 20.06 ± 4.79    |
| Layer IV                   | 25.83 ± 4.16                       | 45.68 ± 7.94***  | 14.29 ± 3.47                       | 23.23 ± 4.72**  | 16.79 ± 2.48                       | 21.50 ± 4.22    |
| Visual cortex              |                                    |                  |                                    |                 |                                    |                 |
| Layer I                    | 21.52 ± 2.44                       | 42.42 ± 7.26***  | 13.69 ± 4.21                       | 24.62 ± 4.97*** | 14.21 ± 2.48                       | 21.55 ± 3.83*   |
| Layer IV                   | 21.52 ± 2.70                       | 49.95 ± 7.92***  | 15.58 ± 5.00                       | 29.33 ± 3.56*** | 15.13 ± 3.15                       | 23.94 ± 4.19    |
| Layer VI                   | 23.25 ± 2.11                       | 42.19 ± 5.80***  | 12.36 ± 2.60                       | 27.56 ± 3.62*** | 13.58 ± 2.62                       | 21.37 ± 3.48*** |
| Preoptic area (LPO/MPO)    | 16.01 ± 4.19                       | 29.25 ± 3.46***  | 13.36 ± 2.59                       | 15.58 ± 2.32    | 12.32 ± 3.90                       | 16.93 ± 3.50    |
| Olfactory tubercle         | 17.35 ± 2.68                       | 45.28 ± 8.80***  | 15.70 ± 2.79                       | 21.55 ± 5.96    | 15.37 ± 5.04                       | 25.84 ± 6.64**  |
| Diagonal band ventral      | 22.42 ± 2.66                       | 45.49 ± 9.71***  | 15.49 ± 5.01                       | 23.52 ± 8.01    | 15.23 ± 3.38                       | 18.99 ± 7.65    |
| Hippocampus                |                                    |                  |                                    |                 |                                    |                 |
| Dentate gyrus              | 21.94 ± 2.09                       | 39.16 ± 5.61***  | 16.01 ± 5.91                       | 20.62 ± 4.15    | 12.65 ± 2.21                       | 21.55 ± 3.46**  |
| SLM                        | 28.44 ± 2.14                       | 55.89 ± 10.30*** | 17.13 ± 4.29                       | 29.18 ± 5.07**  | 16.11 ± 2.39                       | 28.24 ± 1.87**  |
| Caudate putamen            |                                    |                  |                                    |                 |                                    |                 |
| Ventral                    | 19.88 ± 3.80                       | 41.69 ± 7.92***  | 13.59 ± 1.54                       | 23.51 ± 7.00**  | 13.40 ± 2.33                       | 23.65 ± 5.18*** |
| Lateral                    | 19.45 ± 3.57                       | 43.43 ± 8.07***  | 13.94 ± 2.24                       | 23.92 ± 6.57**  | 13.96 ± 2.59                       | 22.35 ± 4.05**  |
| Medial                     | 18.90 ± 3.90                       | 40.91 ± 9.06***  | 14.49 ± 2.16                       | 22.96 ± 7.14*   | 15.46 ± 2.46                       | 24.04 ± 5.38*   |
| Lateral geniculate nu      | 32.73 ± 3.36                       | 62.51 ± 10.24*** | 21.58 ± 4.13                       | 37.16 ± 7.37**  | 19.52 ± 3.51                       | 35.21 ± 9.86**  |
| Thalamus                   |                                    |                  |                                    |                 |                                    |                 |
| Ventroposterior lateral nu | 28.88 ± 4.15                       | 57.47 ± 9.48***  | 23.45 ± 5.28                       | 29.75 ± 6.26    | 17.64 ± 4.40                       | 32.36 ± 8.89*** |
| Paratenial nu              | 22.68 ± 5.37                       | 42.71 ± 7.63***  | 19.26 ± 2.55                       | 24.25 ± 9.00    | 15.68 ± 3.29                       | 27.59 ± 4.61**  |

|                                        |              |                  |              |                |              |                 |
|----------------------------------------|--------------|------------------|--------------|----------------|--------------|-----------------|
| Anteroventral nu                       | 38.27 ± 9.31 | 74.67 ± 11.29*** | 26.24 ± 5.36 | 36.71 ± 10.30  | 24.70 ± 3.76 | 37.03 ± 7.08*   |
| Anteromedial nu                        | 25.86 ± 5.52 | 51.43 ± 8.39***  | 20.49 ± 3.97 | 26.37 ± 7.68   | 17.43 ± 3.46 | 35.35 ± 8.16*** |
| Reticular nu                           | 28.78 ± 5.54 | 53.21 ± 8.81***  | 19.68 ± 2.61 | 28.50 ± 6.11   | 17.56 ± 2.85 | 33.54 ± 8.17*** |
| Subthalamic nu                         | 30.42 ± 3.72 | 70.68 ± 11.19*** | 22.24 ± 3.45 | 28.39 ± 8.70   | 21.99 ± 5.11 | 26.72 ± 8.93    |
| Hypothalamus                           |              |                  |              |                |              |                 |
| Supraoptic nu                          | 16.65 ± 3.05 | 34.50 ± 4.42***  | 13.26 ± 1.38 | 17.27 ± 4.17   | 13.52 ± 4.62 | 17.82 ± 1.91    |
| Posterior                              | 25.27 ± 4.77 | 46.65 ± 8.50***  | 15.76 ± 4.08 | 22.96 ± 5.91   | 15.25 ± 3.47 | 24.84 ± 3.57**  |
| Interpeduncular nu                     | 39.44 ± 5.13 | 77.35 ± 9.91***  | 27.20 ± 6.92 | 36.91 ± 8.63   | 25.77 ± 3.54 | 37.41 ± 10.28   |
| Pretectal area                         | 27.51 ± 4.22 | 59.79 ± 6.65***  | 16.05 ± 3.86 | 26.97 ± 5.79** | 16.30 ± 3.35 | 30.45 ± 4.30*** |
| Grey layer sup colliculus              | 24.72 ± 3.33 | 49.41 ± 6.45***  | 15.68 ± 2.87 | 26.67 ± 7.10** | 15.90 ± 2.04 | 26.81 ± 3.23*** |
| Superior colliculus                    | 24.80 ± 2.47 | 51.92 ± 11.22*** | 21.09 ± 6.30 | 28.69 ± 6.71   | 15.82 ± 2.80 | 30.00 ± 5.34*** |
| Inferior colliculus                    | 43.06 ± 9.39 | 82.49 ± 13.77*** | 26.60 ± 4.82 | 44.20 ± 8.36** | 26.15 ± 6.91 | 38.30 ± 5.82**  |
| Flocculus                              | 30.51 ± 5.40 | 57.19 ± 7.23***  | 20.05 ± 4.49 | 33.69 ± 4.76** | 19.33 ± 4.60 | 29.28 ± 9.72*   |
| Molecular layer cerebellar gray matter |              |                  |              |                |              |                 |
|                                        | 33.28 ± 9.21 | 75.97 ± 5.55***  | 25.69 ± 2.86 | 38.64 ± 6.09** | 24.31 ± 4.84 | 37.70 ± 8.05*   |
| Non-blood-brain barrier regions        |              |                  |              |                |              |                 |
| Subformical organ                      | 20.66 ± 5.47 | 51.42 ± 12.90*** | 14.22 ± 2.92 | 21.35 ± 6.14   | 15.42 ± 3.12 | 23.18 ± 5.19    |

Data are mean ± SD.  $k^* = (\text{ml/s/g}) \times 10^{-4}$

Abbreviations: nu, nucleus; SLM, stratum lacunosum-moleculae of hippocampus. Mice were given methylatropine (4 mg/kg, sc) or saline 17 min before administration of saline or arecoline (30 mg/kg ip). [ $^{14}\text{C}$ ]DHA infusion was started 3 min after arecoline administration. In cases of statistically significant genotype x arecoline interactions, main effects are not reported, and Bonferroni post-tests were performed. \* $p < 0.05$ ; \*\* $p < 0.01$ ; \*\*\* $p < 0.001$ ; iPLA $_2\beta^{+/+}$  plus arecoline vs. iPLA $_2\beta^{+/+}$  saline; iPLA $_2\beta^{+/-}$  plus arecoline vs. iPLA $_2\beta^{+/-}$  saline, iPLA $_2\beta^{-/-}$  plus arecoline vs. iPLA $_2\beta^{-/-}$  saline.
